# Supplementary material
Source: PubMed Central journal article supplement (PMC7836814)
Supplement: mmc1.pdf [file mmc1.pdf]

Supplementary Material: T cell subsets in each patient group

CD3<sup>+</sup>CD4<sup>+</sup> T cells

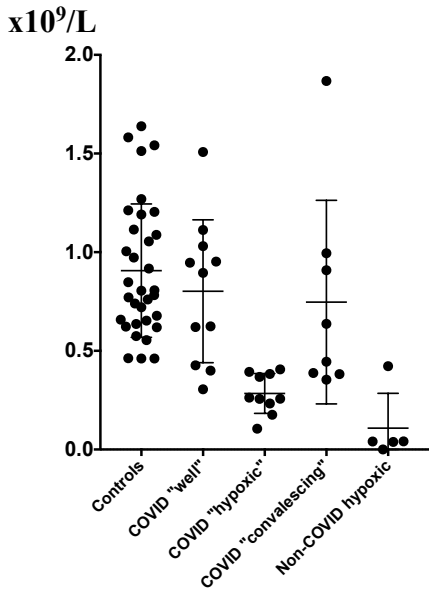

CD3<sup>+</sup>CD8<sup>+</sup> T cells

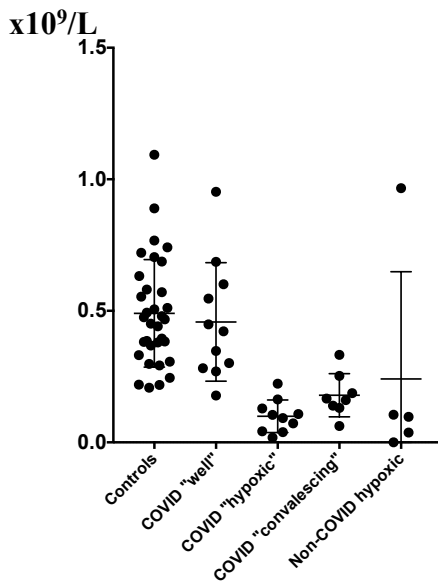

CD4<sup>+</sup> Naïve T cells

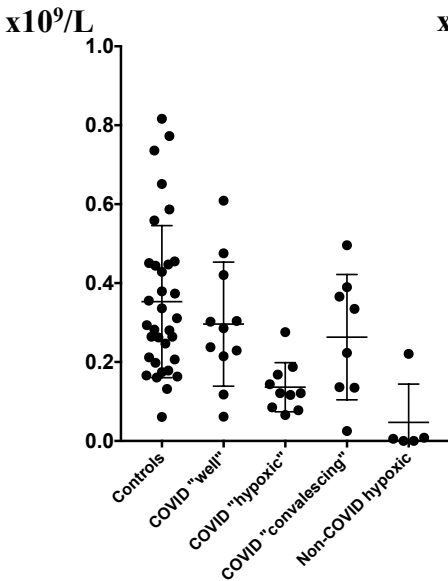

CD8<sup>+</sup> Naïve T cells

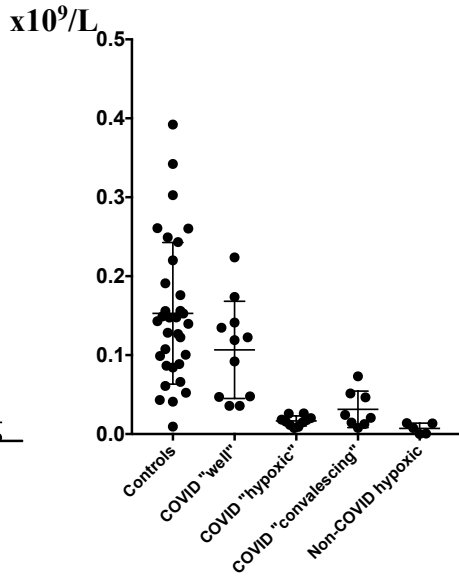

CD4<sup>+</sup> Central Memory T cells

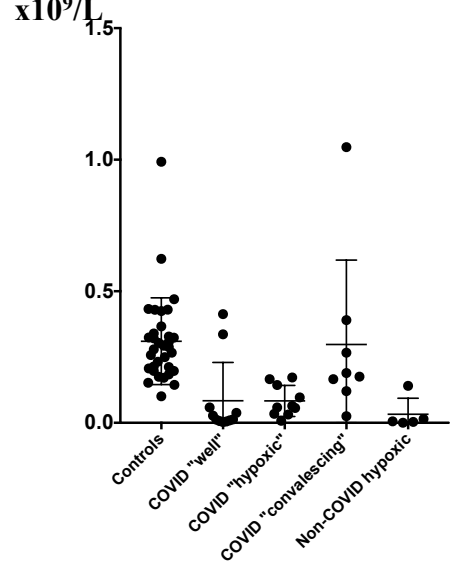

CD8<sup>+</sup> Central Memory T cells

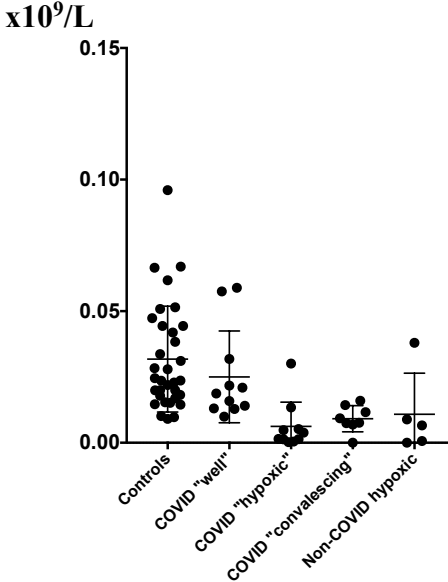

PD1<sup>+</sup> T helper cells

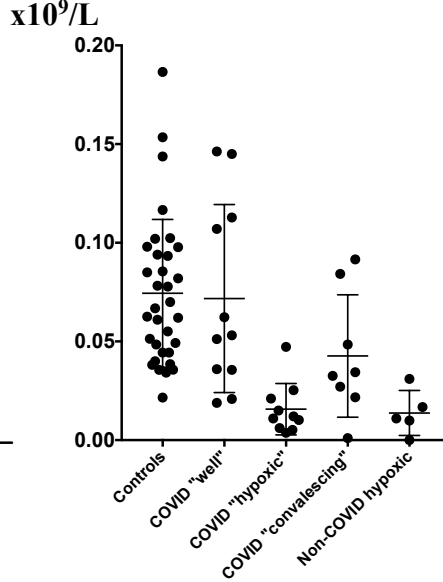

PD1<sup>-</sup> T helper cells

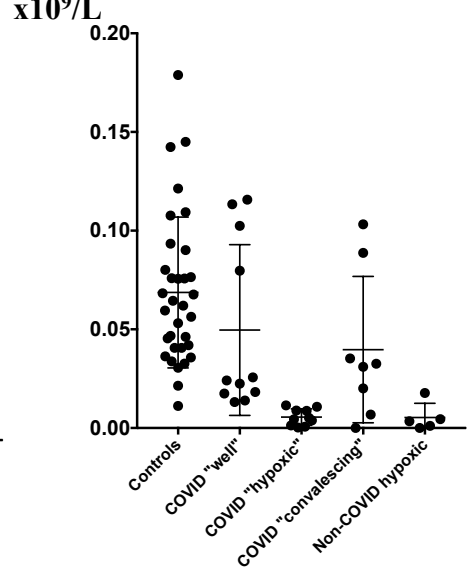

Absolute numbers of the indicated T cell subpopulations in each patient group using the Duraclone IM T Subset antibody panel (Beckman Coulter, B53328)

CD4<sup>+</sup> Naïve T cells CD3<sup>+</sup>CD4<sup>+</sup>CD27<sup>+</sup>CD197<sup>+</sup>CD45RA<sup>+</sup>, CD8<sup>+</sup> Naïve T cells CD3<sup>+</sup>CD8<sup>+</sup>CD27<sup>+</sup>CD197<sup>+</sup>CD45RA<sup>+</sup>, CD4<sup>+</sup> Central Memory T cells CD3<sup>+</sup>CD4<sup>+</sup>CD27<sup>+</sup>CD197<sup>+</sup>CD45RA<sup>-</sup>, CD8<sup>+</sup> Central Memory T cells CD3<sup>+</sup>CD8<sup>+</sup>CD27<sup>+</sup>CD197<sup>+</sup>CD45RA<sup>-</sup>, PD1<sup>+</sup> T helper cells CD3<sup>+</sup>CD4<sup>+</sup>CD197<sup>lo</sup>CD279<sup>+</sup>CD45RA<sup>-</sup>, PD1<sup>-</sup> T helper cells CD3<sup>+</sup>CD4<sup>+</sup>CD197<sup>lo</sup>CD279<sup>-</sup>CD45RA<sup>-</sup>
